# Supplementary material for: Mannose-Binding Lectin Reduces Oxidized Low-Density Lipoprotein Induced Vascular Endothelial Cells Injury by Inhibiting LOX1-ox-LDL Binding and Modulating Autophagy
Source: MDPI journal article supplement (doi:10.3390/biomedicines11061743), 2023-06-17
Supplement: s1 [file s1]

# Supplementary Table

Table S1. Clinical characteristics and serum MBL concentration of children with obesity and healthy controls (n =199)

| Characteristics           | Overall       | Control group  | Obese group    | P     |
|---------------------------|---------------|----------------|----------------|-------|
| Number                    | 199           | 105            | 94             |       |
| Male (%)                  | 65.69         | 58.10          | 73.74          |       |
| Age (y), mean (SD)        | 10.36(2.62)   | 10.35(2.51)    | 10.38(2.74)    | 0.56  |
| BMI (kg/m2), median (IQR) | 23.46(8.75)   | 19.06(2.82)    | 28.12(5.12)    | <0.00 |
|                           |               |                |                | 1     |
| ALT (U/L), median (IQR)   | 38.47(20.50)  | 21.54(13.00)   | 56.42(53.00)   | <0.00 |
|                           |               |                |                | 1     |
| AST (U/L), median (IQR)   | 33.79(14.00)  | 29.53(12.50)   | 38.31(23.00)   | <0.00 |
|                           |               |                |                | 1     |
| MBL (ng/ml), median (IQR) | 927.60(908.59 | 909.69(523.51) | 625.90(1151.85 | <0.00 |
|                           | )             |                | )              | 1     |
| SBP (mmHg), mean (SD)     |               |                | 149.99(14.38)  |       |
| DBP (mmHg), median (IQR)  |               |                | 66.00(11.00)   |       |
| TG (mmol/L), median (IQR) |               |                | 1.12(0.64)     |       |
| TC (mmol/L), mean (SD)    |               |                | 4.21(0.47)     |       |
| LDL-C(mmol/L), mean (SD)  |               |                | 2.44(0.55)     |       |
| HDL-C(mmol/L), mean (SD)  |               |                | 1.24(0.25)     |       |
| Left cIMT(cm), median     |               |                | 0.06(0.02)     |       |
| (IQR)                     |               |                |                |       |

|       |                  |              |
|-------|------------------|--------------|
| Right | cIMT(cm), median | 0.06(0.01)   |
|       | (IQR)            |              |
|       | HC (cm)          | 93.05(10.04) |
|       | WC (cm)          | 95.60(10.42) |

---

## Supplementary figures

A

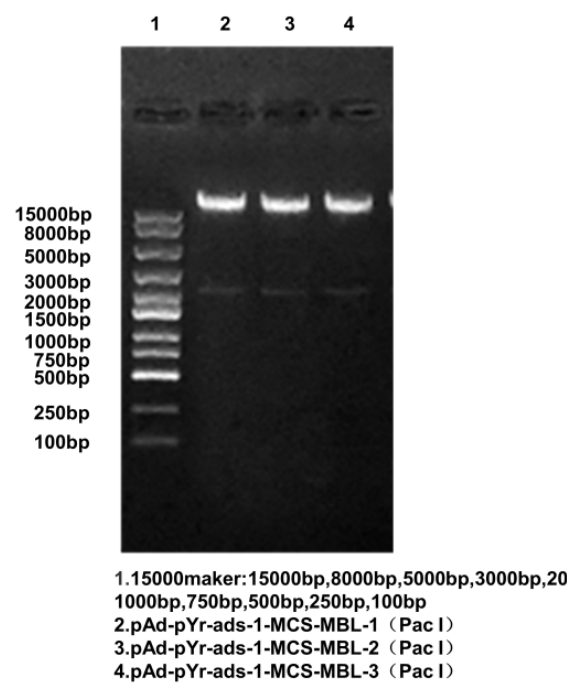

B

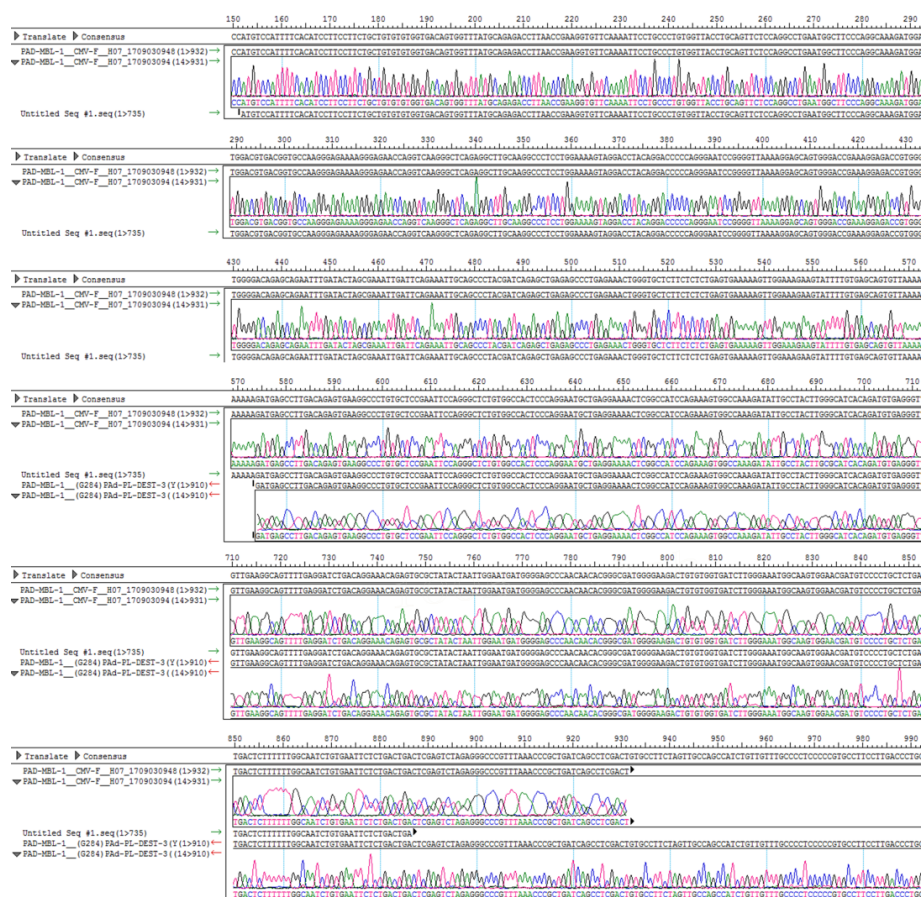

C

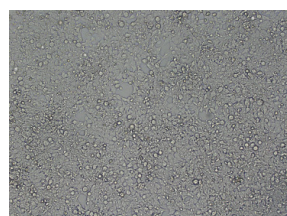

D

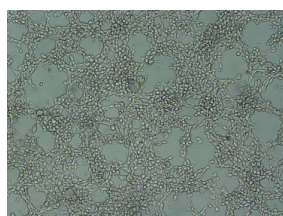

E

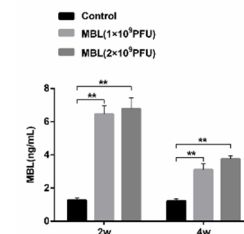

Figure S1 **Identification of adenovirus packaging.** A. Enzyme digestion identification map. B. Sequencing identification. C. White light image at 48 h after adenovirus infection. D. The white light image after amplification. E. MBL level in serum. \*\*Indicates  $p < 0.01$  vs. WT or control, # Indicates  $p < 0.01$  vs. ApoE<sup>-/-</sup>.

A

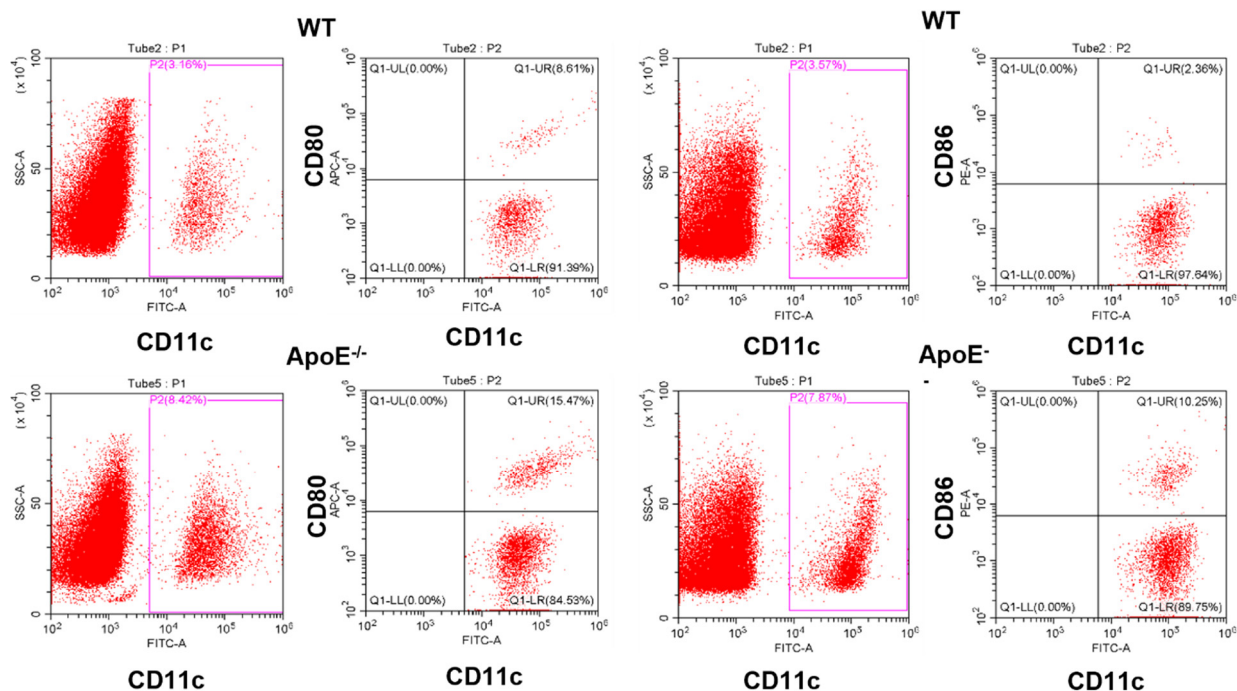

B

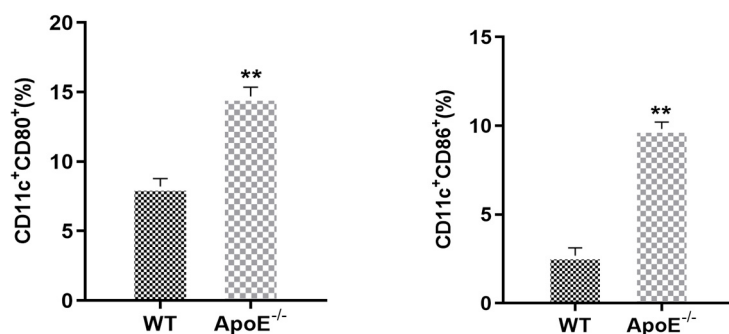

**Figure S2. DCs maturation rate in ApoE<sup>-/-</sup> and WT mice.** DCs were isolated from the spleen of ApoE<sup>-/-</sup> and WT mice after 16 weeks' HFD. A. Flow cytometry of DCs, B. Quantification of DCs: the proportion of CD11c<sup>+</sup>CD80<sup>+</sup> and CD11c<sup>+</sup>CD86<sup>+</sup> in ApoE<sup>-/-</sup> mice were significantly higher than that of WT mice. Note: \*\* p < 0.01.

A

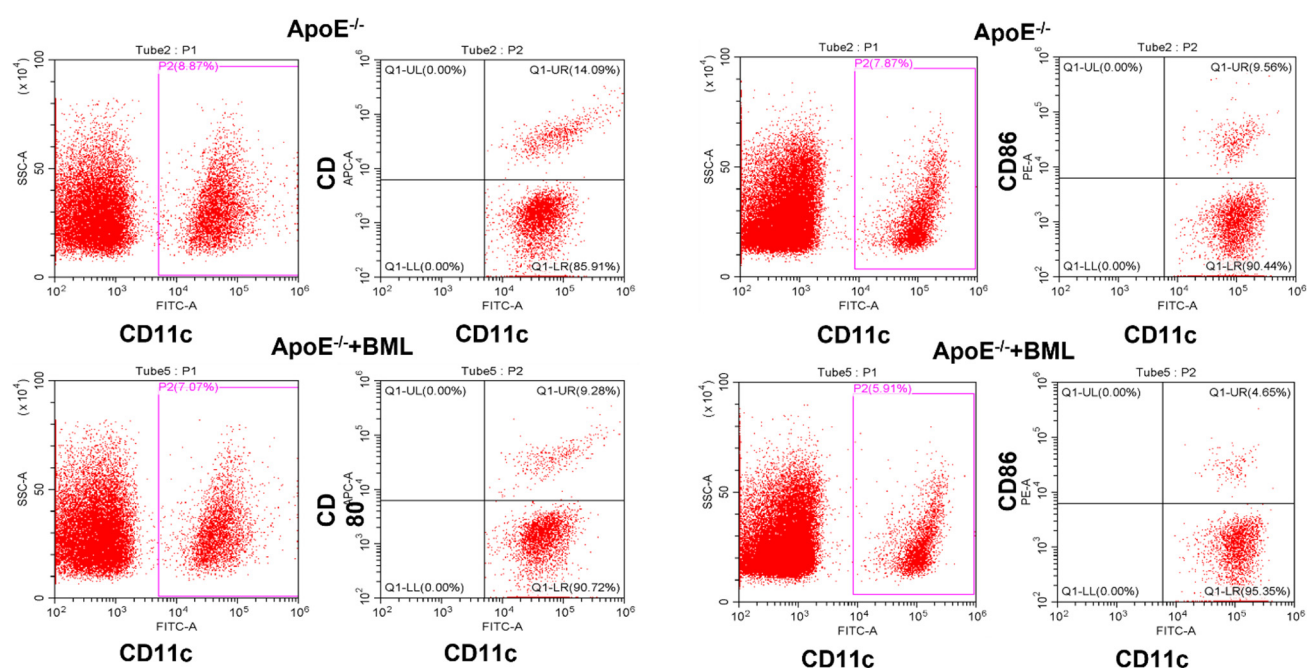

B

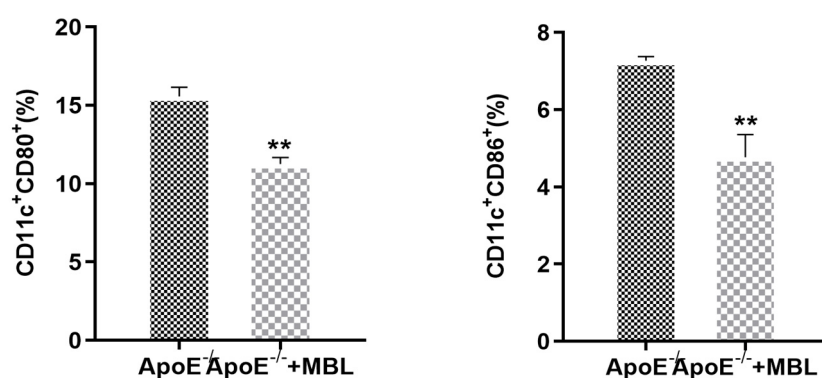

**Figure S3. DCs maturation rate in MBL transfected  $ApoE^{-/-}$  and  $ApoE^{-/-}$  mice.** DCs were isolated from the spleen of  $ApoE^{-/-}$  and WT mice after 16 weeks' HFD. A. Flow cytometry of DCs, B. Quantification of DCs: the proportion of CD11c<sup>+</sup>CD80<sup>+</sup> and CD11c<sup>+</sup>CD86<sup>+</sup> were significantly decreased in MBL-adenovirus compared to blank-adenovirus injected  $ApoE^{-/-}$  mice. Note: \*\*  $p < 0.01$ .
